RESEARCH ARTICLE

# Adverse Effects of Plant Food Supplements Self-Reported by Consumers in the PlantLIBRA Survey Involving Six European Countries

Patrizia Restani<sup>1\*</sup>, Chiara Di Lorenzo<sup>1</sup>, Alicia Garcia-Alvarez<sup>2</sup>, Mihaela Badea<sup>3</sup>, Alessandro Ceschi<sup>4,5,6</sup>, Bernadette Egan<sup>7</sup>, Lorena Dima<sup>3</sup>, Saskia Lüde<sup>4</sup>, Franco M. Maggi<sup>1</sup>, Angela Marculescu<sup>3</sup>, Raimon Milà-Villarroya<sup>2</sup>, Monique M. Raats<sup>7</sup>, Lourdes Ribas-Barba<sup>2,9</sup>, Liisa Uusitalo<sup>8</sup>, Lluís Serra-Majem<sup>2,9,10</sup>

**1** Dipartimento di Scienze Farmacologiche e Biomolecolari, Università degli Studi di Milano, Milano, Italy, **2** Fundación para la Investigación Nutricional, Barcelona Science Park, University of Barcelona, Barcelona, Spain, **3** Transilvania University of Brasov, Brasov, Romania, **4** National Poisons Center, Tox Info Suisse, Associated Institute of the University of Zurich, Zurich, Switzerland, **5** Division of Clinical Pharmacology and Toxicology, Department of Internal Medicine, Ente Ospedaliero Cantonale, Lugano, Switzerland, **6** Department of Clinical Pharmacology and Toxicology, University Hospital Zurich, Zurich, Switzerland, **7** Food, Consumer Behaviour and Health Research Centre, University of Surrey, Guildford, Surrey, United Kingdom, **8** Finnish Food Safety Authority Evira, Helsinki, Finland, **9** Ciber Obn Fisiopatología de la Obesidad y la Nutrición, Instituto de Salud Carlos III, Madrid, Spain, **10** Institute of Biomedical and Health Research of Las Palmas, University of Las Palmas de Gran Canaria, Las Palmas de Gran Canaria, Spain

\* [patrizia.restani@unimi.it](mailto:patrizia.restani@unimi.it)

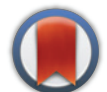

CrossMark  
click for updates

OPEN ACCESS

**Citation:** Restani P, Di Lorenzo C, Garcia-Alvarez A, Badea M, Ceschi A, Egan B, et al. (2016) Adverse Effects of Plant Food Supplements Self-Reported by Consumers in the PlantLIBRA Survey Involving Six European Countries. PLoS ONE 11(2): e0150089. doi:10.1371/journal.pone.0150089

**Editor:** Pratibha V. Nerurkar, College of Tropical Agriculture and Human Resources, University of Hawaii, UNITED STATES

**Received:** October 14, 2015

**Accepted:** February 9, 2016

**Published:** February 29, 2016

**Copyright:** © 2016 Restani et al. This is an open access article distributed under the terms of the [Creative Commons Attribution License](https://creativecommons.org/licenses/by/4.0/), which permits unrestricted use, distribution, and reproduction in any medium, provided the original author and source are credited.

**Data Availability Statement:** The authors confirm that data of the WHOLE SURVEY are available upon request from: Lluís Sierra Majem, Fundación para la Investigación Nutricional, Barcelona Science Park, University of Barcelona, Barcelona, Spain (Email: [lluis.serra@ulpgc.es](mailto:lluis.serra@ulpgc.es)). All relevant data for the present paper are included in [Table 3](#).

**Funding:** The research leading to these results has received funding from the European Community's Seventh Framework Programme (FP7/2007–2013)

## Abstract

### Background

The use of food supplements containing botanicals is increasing in European markets. Although intended to maintain the health status, several cases of adverse effects to Plant Food Supplements (PFS) have been described.

### Objectives

To describe the self-reported adverse effects collected during the European PlantLIBRA PFS Consumer Survey 2011–2012, with a critical evaluation of the plausibility of the symptomatology reported using data from the literature and from the PlantLIBRA Poisons Centers' survey.

### Subjects/Setting

From the total sample of 2359 consumers involved in the consumers' survey, 82 subjects reported adverse effects due to a total of 87 PFS.

### Results

Cases were self-reported, therefore causality was not classified on the basis of clinical evidence, but by using the frequency/strength of adverse effects described in scientific papers:

under grant agreement n. 245199. It has been carried out within the PlantLIBRA project ([www.plantlibra.eu](http://www.plantlibra.eu)).

**Competing Interests:** The authors have declared that no competing interests exist.

52 out of 87 cases were defined as possible (59.8%) and 4 as probable (4.6%). Considering the most frequently cited botanicals, eight cases were due to *Valeriana officinalis* (garden valerian); seven to *Camellia sinensis* (tea); six to *Ginkgo biloba* (Maidenhair tree) and *Paullinia cupana* (guarana). Most adverse events related to the gastrointestinal tract, nervous and cardiovascular systems.

## Conclusions

Comparing the data from this study with those published in scientific papers and obtained by the PlantLIBRA Poisons Centers' survey, some important conclusions can be drawn: severe adverse effects to PFS are quite rare, although mild or moderate adverse symptoms can be present. Data reported in this paper can help health professionals (and in particular family doctors) to become aware of possible new problems associated with the increasing use of food supplements containing botanicals.

## Introduction

The European Union (EU) Directive on Food Supplements (2002/46/EC) defines food supplements (which include PFS): "... foodstuffs the purpose of which is to supplement the normal diet and which are concentrated sources of nutrients or other substances with a nutritional or physiological effect, alone or in combination, marketed in dose form, namely forms such as capsules, pastilles, tablets, pills and other similar forms, sachets of powder, ampoules of liquids, drop dispensing bottles and other similar forms of liquids and powders designed to be taken in measured small quantities". Their market is growing significantly both in Europe and the USA [1]. Although there exists some overlap/confusion with traditional herbal medicinal products [2], plant food supplements cannot be sold as having any diagnostic, preventative or therapeutic properties; their role is only complementary to the diet.

The consumption of Plant Food Supplements (PFS) is usually estimated on the basis of market data, and mainly from import/export of raw ingredients, but since botanicals are used in both food and medicinal areas, the extrapolation to PFS is quite difficult [3]. Data on the use of dietary supplements reported by consumers are very limited and normally include only those products containing vitamins and minerals [4]; other available data come from studies relating to complementary/traditional medicine [5].

To provide new data on PFS usage patterns, a survey was performed with consumers of PFS in the framework of the European Project PlantLIBRA (n. 249159); it involved 2359 adults from Finland, Germany, Italy, Romania, Spain and UK. The main results of the PlantLIBRA PFS Consumer Survey (2011–2012) were published in 2014 [6]; the present paper deals with the adverse effects self-reported by the consumers participating in the survey.

Adverse effects to PFS have been reported by several authors; most of the studies were: a) case reports describing a specific acute event, or b) reviews of cases in a specific clinical area (cardiovascular, gastrointestinal, etc.) [7–8]. A critical limitation of the information reported to date in the scientific literature is a lack of assessment of causality; in other words, the strict association between the intake of a specific plant and the clinical event is rarely demonstrated by measuring biomarkers or by the de-challenge/re-challenge approach. On this basis, a systematic review of the data on adverse effects due to PFS/botanical ingredients, including mis-identification and interactions of PFS/botanicals with pharmaceutical drugs or nutrients was undertaken [9]. Data were collected for 66 botanicals, which are common ingredients of PFS;

all papers were classified for causality according to the WHO guidelines [10] and grouped as "certain, probable, possible and uncertain/unclassifiable events". Among the 492 papers selected, 402 (81.7%) dealt with adverse effects due to the botanical as such or in a PFS, and 89 (18.1%) described interactions with conventional drugs. Misidentification was confirmed in one case [9].

The aims of this paper are: 1) to identify the adverse effects reported by the European participants in the PlantLIBRA PFS Consumer Survey, and 2) to critically evaluate the plausibility of the symptomatology reported as being related to PFS.

## Materials and Methods

The survey was conducted in 6 European countries (Finland, Germany, Italy, Romania, Spain and the United Kingdom), and recruitment of participants occurred in 4 cities in each country. In this study, "Botanical" means raw material and derived preparations made from plants, algae, fungi or lichens (<http://www.efsa.europa.eu/en/topics/topic/botanicals>). The botanicals to be included in the survey were clearly defined at the outset; PFS were defined as the "food-stuffs the purpose of which is to supplement the normal diet and which are concentrated sources of botanical preparations that have nutritional or physiological effect, alone or in combination with vitamins, minerals and other substances which are not plant-based". Herbal remedies, other medicinal products based on botanicals, herbal teas or juices were excluded [6].

In order to obtain a sample of 400 consumers/each country, approximately 2000 individuals were screened per country (total number close to 2400) [6]. Eligible consumers completed a detailed questionnaire on PFS usage, providing product/plant names, dosage forms, frequency of use, reasons for use, adverse effects, places and patterns of purchase and information sources on products. Data on a maximum of five different PFS for each consumer was recorded; when PFS were more than 5, the inclusion was based on the frequency of use. Responders' sociodemographic data, including age, gender, level of education and employment status, as well as height, weight and health-related lifestyle information, were also collected. Further details on the survey have been reported previously [6]. The composition of each PFS was obtained from the label, if at disposal, or by searching the PFS ingredients in the website of producers.

Regarding the collection of data on adverse effects, the following two questions were included for each product:

1. Have you experienced any adverse effects while taking this product?
2. If yes, which one? (list of symptoms provided, with "other" as an option).

## Ethical aspects

Approval of the survey protocols was obtained from four ethics committees: the Bioethics Commission of the University of Barcelona, Spain; the Ethics Committee of the Università degli Studi di Milano, Italy; the Ethical Committee of the Faculty of Medicine—Transilvania University of Brasov, Romania; and the Coordinating Ethics Committee, Hospital District of Helsinki and Uusimaa, Finland.

Approval of the survey by these four ethics Committees required submitting all survey material to their members for evaluation. No ethical approval for the survey was needed in Germany and the United Kingdom. Furthermore, the ethical aspects were considered in the European Commission Consolidated Review Report dated 30<sup>th</sup> September 2013 and evaluated as "ethical issues regarding the surveys have been handled appropriately".

In all countries, informed consent was obtained from survey participants verbally after reading the survey information sheet. The data were collected anonymously on paper

**Table 1. Consumers included in the PlantLIBRA PFS Consumer Survey and self-reporting adverse effects.**

| Country        |                     | Number of consumers in the survey | Number of consumers reporting adverse effects | Percentage |
|----------------|---------------------|-----------------------------------|-----------------------------------------------|------------|
| Finland        | Total number        | 401                               | 23                                            | 5.7        |
|                | Males               | 193                               | 10                                            | 5.2        |
|                | Females             | 208                               | 13                                            | 6.3        |
| Germany        | Total number        | 398                               | 22                                            | 5.5        |
|                | Males               | 197                               | 13                                            | 6.6        |
|                | Females             | 201                               | 9                                             | 4.5        |
| Italy          | Total number        | 378                               | 5                                             | 1.3        |
|                | Males               | 187                               | 2                                             | 1.1        |
|                | Females             | 191                               | 3                                             | 1.6        |
| Romania        | Total number        | 400                               | 7                                             | 1.8        |
|                | Males               | 199                               | 4                                             | 2.0        |
|                | Females             | 201                               | 3                                             | 1.5        |
| Spain          | Total number        | 402                               | 24                                            | 6.0        |
|                | Males               | 174                               | 9                                             | 5.2        |
|                | Females             | 228                               | 15                                            | 6.6        |
| United Kingdom | Total number        | 380                               | 1                                             | 0.3        |
|                | Males               | 191                               | 1                                             | 0.5        |
|                | Females             | 189                               | 0                                             | -          |
| <b>Total</b>   | <b>Total number</b> | <b>2359</b>                       | <b>82</b>                                     | <b>3.5</b> |
|                | <b>Males</b>        | <b>1141</b>                       | <b>39</b>                                     | <b>3.4</b> |
|                | <b>Females</b>      | <b>1218</b>                       | <b>43</b>                                     | <b>3.5</b> |

doi:10.1371/journal.pone.0150089.t001

questionnaires and then transferred to an electronic database; all responders were assigned an ID number prior to data analyses.

### Statistical analysis

All data were entered into the statistical package SPSS for Windows v. 18 (IBM Corporation, Somers, NY, USA), which was used for analysis.

### Results and Discussion

A total of 11783 consumers (5799 males and 6004 females) were screened during the PlantLIBRA survey, of which 2359 were considered eligible and included in the study. The number of consumers per country and the percentage self-reporting adverse effects are listed in [Table 1](#).

Considering the entire survey, the percentage of consumers, who reported adverse effects was approximately 3.5%. Differences were observed between countries; the number of consumers reporting adverse effects ranged between 5 and 6% of the total interviewed in three countries (Finland, Germany and Spain), while they were less numerous in Romania (2%), Italy (1%) and the United Kingdom (0.3%).

There were no significant differences based on sex or age groups ([Table 1](#) and [Table 2](#)).

The data collected on adverse effects are presented in [Table 3](#). Details of each of the 82 cases are recorded including:

- ID of the 82 consumers reporting adverse effects. ID 1–23 were from Finland, ID 24–45 from Germany, ID 46–69 from Spain, ID 70–74 from Italy, ID 75–81 from Romania, ID 82 from the United Kingdom. When a consumer reported adverse effects for two PFS, letters A and B follows the ID;

- Age and gender;
- The botanical/s contained in the PFS associated with the reported adverse effect. For a more precise identification, Latin names have been used but the corresponding common names are reported in [Table 4](#) (see table note for scientific sources);
- The daily dose and the period of intake;
- The reason for use reported by the consumer, i.e. the physiological effect expected by the consumer;
- An assessment of the suitability of the botanical ingredient(s) present in the consumed PFS for the condition used, based on what the literature says about these ingredients. The main literature sources were the list of physiological effects published by the Italian Ministry of Health [11] and the EMA website [12]. In specific cases, other scientific papers were cited;
- The general health status of the consumer. These data allow a better assessment of adverse effect causality;
- Any reported simultaneous intake of conventional medicines and other food supplements; these data allow the assessment of possible interactions;
- The adverse effects reported by the consumers;
- A judgement as to the likelihood of causality, according to previous scientific citations and taking into consideration all available data.

Considering the suitability of the botanical product used in relation to the physiological effect expected by the consumers, the choice was considered appropriate in 88% of cases. One case (ID 4) was considered non pertinent and nine (ID 8, 11, 12, 18, 23, 33, 44, 57, 74) judged as unlikely or with limited evidence. One consumer (ID 08) used a product containing 12 herbal ingredients, but only *Citrus aurantium* could claim to have tonic properties due to the presence of active amines. None of the herbal ingredients present have any reported immune activity [11–12].

Since all cases were self-reported, it was not possible to establish causality of adverse effects on the basis of clinical evidence. The scientific literature was used to assess the likelihood of the

**Table 2. Age of consumers included in the PlantLIBRA PFS Consumer Survey and of those reporting adverse effects.**

| Country        | Consumers in the whole survey (m ±SD) | Consumers reporting adverse effects (m ±SD) |
|----------------|---------------------------------------|---------------------------------------------|
| Finland        | 48.3±15.7                             | 48.7±13.8                                   |
| Germany        | 47.0±15.8                             | 48.3±16.4                                   |
| Italy          | 44.0±16.2                             | 40.6±15.2                                   |
| Romania        | 42.9±16.7                             | 43.1±17.9                                   |
| Spain          | 47.1±13.9                             | 50.6±11.4                                   |
| United Kingdom | 48.9±14.2                             | 35.0 <sup>a</sup>                           |
| <b>Total</b>   | <b>46.4±15.6</b>                      | <b>48.0±14.2</b>                            |

m±SD = mean±Standard Deviation

<sup>a</sup> no SD since only one consumer reported adverse effects

doi:10.1371/journal.pone.0150089.t002

**Table 3. Adverse effects reported by PlantLIBRA PFS Consumer Survey participants.**

| ID | Age/<br>Gender | Botanical/s^                                                                                                                                                                                                                                                                                                                | Dose<br>and<br>period | Reasons for<br>use | "Suitability" | Present or<br>past main<br>health<br>problems | Conventional<br>drugs + FS                                              | Adverse<br>effects      | Causality                                                                                                  |
|----|----------------|-----------------------------------------------------------------------------------------------------------------------------------------------------------------------------------------------------------------------------------------------------------------------------------------------------------------------------|-----------------------|--------------------|---------------|-----------------------------------------------|-------------------------------------------------------------------------|-------------------------|------------------------------------------------------------------------------------------------------------|
| 01 | 55/F           | <i>Camellia sinensis</i> , <i>Panax ginseng</i>                                                                                                                                                                                                                                                                             | 1/d x 2w              | Tonic              | Yes [11]      | Migraine                                      | Antihistaminics, Corticosteroids, Ibuprofen, Roxithromycin + FO, PO, VM | Gastric problems        | Possible worsening of gastric side effects of anti-inflammatory drugs                                      |
| 02 | 31/M           | <i>Echinacea angustifolia</i> , <i>E. purpurea</i>                                                                                                                                                                                                                                                                          | 2/d x 2w              | Immunity           | Yes [11–12]   | None                                          | No drug + AA, VM                                                        | Gastric problems        | Possible [43–44]                                                                                           |
| 03 | 55/F           | <i>Glycine max</i>                                                                                                                                                                                                                                                                                                          | 1/d x 6m              | Menopause          | Yes [11]      | Allergy                                       | Antiallergic drugs + Vitamin D                                          | Gastric problems        | Possible [45–46]                                                                                           |
| 04 | 36/F           | <i>Gossypium spp.</i> , <i>Zingiber officinale</i>                                                                                                                                                                                                                                                                          | 2/d x 3m              | Neuralgia          | No            | Allergy/ asthma, joint/ bone pain             | Budesonide, Formoterol, Salbutamol + FO, V                              | Gastric problems        | Possible [14; 47]                                                                                          |
| 05 | 54/F           | <i>Zingiber officinale</i>                                                                                                                                                                                                                                                                                                  | 1/d x 24d             | Joints/bones       | Yes [11]      | HCHO                                          | Simvastatin + PO, VM                                                    | Gastric problems        | Possible [14; 47]                                                                                          |
| 06 | 72/F           | <i>Echinacea angustifolia</i> , <i>E. purpurea</i> ,                                                                                                                                                                                                                                                                        | 3/d x 4d              | Immunity           | Yes [11–12]   | HCHO                                          | No drug + Vitamin D                                                     | Gastric problems        | Possible [43–44]                                                                                           |
| 07 | 57/F           | <i>Echinacea angustifolia</i> , <i>E. purpurea</i> ,                                                                                                                                                                                                                                                                        | 3/d x 3d              | Immunity           | Yes [11–12]   | Cancer                                        | No drug + FO, V                                                         | Tachycardia             | Unlikely                                                                                                   |
| 08 | 44/F           | <i>Achillea millefolium</i> , <i>Citrus aurantium</i> , <i>Crataegus spp.</i> , <i>Daucus carota</i> , <i>Equisetum arvense</i> , <i>Foeniculum vulgare</i> , <i>Fucus vesiculosus</i> [alga], <i>Hibiscus rosa-sinensis</i> , <i>Ribes nigrum</i> , <i>Spinacia oleracea</i> , <i>Triticum spp.</i> , <i>Urtica dioica</i> | 2/w x 1m              | Immunity, tonic    | Unlikely      | Migraine                                      | No drug + VM                                                            | Gastric problems        | Unassessable due to the presence of several ingredients                                                    |
| 09 | 53/F           | <i>Arctium lappa</i> , <i>Betula spp.</i> , <i>Cichorium intybus</i> , <i>Cynara scolymus</i> , <i>Filipendula ulmaria</i> , <i>Foeniculum vulgare</i>                                                                                                                                                                      | 2/d x 1m              | Detoxification     | Yes [12]      | None                                          | No drug + AA, E, FO, PO, PE, VM                                         | Increased diuresis      | Possible due to the presence of diuretic ingredients [ <i>Betula spp.</i> , <i>Arctium lappa</i> ] [48–49] |
| 10 | 61/M           | <i>Equisetum arvense</i>                                                                                                                                                                                                                                                                                                    | 3/d x 12m             | Hair/skin          | Yes [11]      | None                                          | No drug + FO, V                                                         | Hair loss/ fragile nail | Possible due to decreased level of thiamine [50]                                                           |

(Continued)

Table 3. (Continued)

| ID  | Age/<br>Gender | Botanical/s^                                                                                                                    | Dose<br>and<br>period | Reasons for<br>use                                                | "Suitability"         | Present or<br>past main<br>health<br>problems             | Conventional<br>drugs + FS                                                        | Adverse<br>effects       | Causality                                                                              |
|-----|----------------|---------------------------------------------------------------------------------------------------------------------------------|-----------------------|-------------------------------------------------------------------|-----------------------|-----------------------------------------------------------|-----------------------------------------------------------------------------------|--------------------------|----------------------------------------------------------------------------------------|
| 11  | 31/F           | <i>Calendula officinalis</i> , <i>Citrus sinensis</i> , <i>Dunaliella salina</i> [alga], <i>Glycine max</i> , <i>Picea spp.</i> | 1/d x 6m              | Antioxidant                                                       | Limited evidence [13] | None                                                      | No drug + PO, VM                                                                  | Gastric problems         | Unassessable due to the presence of several ingredients                                |
| 12  | 42/M           | <i>Zingiber officinale</i>                                                                                                      | 1/d x 1m              | Bodybuilding, tonic                                               | Unlikely [14]         | None                                                      | No drug + AA                                                                      | Gastric problems         | Possible [14; 47]                                                                      |
| 13  | 35/M           | <i>Camellia sinensis</i>                                                                                                        | 2/d x 2m              | Immunity, body weight, tonic, HCHO                                | Yes [11]              | HCHO                                                      | No drug + Vitamin D, AA, FO                                                       | Insomnia and nausea      | Possible for the content in caffeine [51]                                              |
| 14  | 39/M           | <i>Olea europaea</i> (olive oil)                                                                                                | 1/d x 9m              | Immunity, hair/skin, tonic, mood, joints/bones, blood circulation | Yes [11]              | Psoriasis                                                 | No drug + FO, PE, VM                                                              | Diarrhoea and nausea     | Possible—high intake of olive oil could produce laxative effect [22]                   |
| 15  | 72/F           | <i>Oryza sativa</i> + <i>Monascus purpureus</i> [fungus]                                                                        | 1/d x 12m             | HCHO                                                              | Yes [15–19]           | Asthma, hypertension, cancer, depression, joint/bone pain | Acetylsalicylic acid, Amlodipine, Lisinopril, Pantoprazole + VM                   | Gastric problems         | Possible [51–52] Possible worsening of gastric side effects of anti-inflammatory drugs |
| 16  | 46/M           | <i>Oryza sativa</i> + <i>Monascus purpureus</i> [fungus]                                                                        | 1/d x 12m             | HCHO                                                              | Yes [15–19]           | HCHO, hypertension                                        | Drugs for hypertension + FO, PO, VM                                               | Increased liver enzymes  | Possible [52–53]                                                                       |
| 17A | 70/M           | <i>Oryza sativa</i> + <i>Monascus purpureus</i> [fungus]                                                                        | 1/d x 11m             | HCHO                                                              | Yes [15–19]           | HCHO, diabetes, hearth disease, allergy, depression       | Acetylsalicylic acid, Enapril, Loratadine, Metoprolol, Mometasone + E, FO, PO, VM | Dry skin                 | Unlikely [52–53]                                                                       |
| 17B |                | <i>Plantago psyllium</i> , <i>Prunus africana</i>                                                                               | 1/d x 2m              | Urinary tract                                                     | Yes [20]              |                                                           |                                                                                   | Gastric problems         | Possible [54] Possible worsening of gastric side effects of anti-inflammatory drugs    |
| 18  | 49/M           | <i>Gossypium spp.</i> , <i>Zingiber officinalis</i>                                                                             | 1/d x 2m              | Sleeping, joints/bones                                            | Unlikely              | Muscle, joint/ bone pain                                  | Glucosamine + VM                                                                  | Gastric problems         | Possible [14, 47]                                                                      |
| 19  | 68/F           | <i>Oryza sativa</i> + <i>Monascus purpureus</i> [fungus]                                                                        | 1/d x 12m             | HCHO                                                              | Yes [15–19]           | HCHO, hypertension, depression                            | Bisoprolol, Olanzapine, Thyroxin, Zopiclon + VM                                   | Difficulty in swallowing | Possible [55]                                                                          |
| 20  | 46/M           | <i>Oryza sativa</i> + <i>Monascus purpureus</i> [fungus]                                                                        | 1/d x 6m              | HCHO                                                              | Yes [21–22]           | HCHO, hypertension, diabetes                              | Metformin, Telmisartan + FO, PO, VM                                               | Increased liver enzymes  | Possible [52–53]                                                                       |
| 21  | 39/F           | <i>Olea europaea</i> , <i>Melissa officinalis</i>                                                                               | 1/d x 2w              | Immunity                                                          | Yes [21–22]           | Migraine, allergy                                         | Enoxaparin+ PO, VM                                                                | Allergic symptoms        | Possible [56]                                                                          |

(Continued)

Table 3. (Continued)

| ID | Age/<br>Gender | Botanical/s^                                                                                                                                                                                                                                                                                                                                                                                                           | Dose<br>and<br>period | Reasons for<br>use                                 | "Suitability"                  | Present or<br>past main<br>health<br>problems | Conventional<br>drugs + FS  | Adverse<br>effects  | Causality                                                           |
|----|----------------|------------------------------------------------------------------------------------------------------------------------------------------------------------------------------------------------------------------------------------------------------------------------------------------------------------------------------------------------------------------------------------------------------------------------|-----------------------|----------------------------------------------------|--------------------------------|-----------------------------------------------|-----------------------------|---------------------|---------------------------------------------------------------------|
| 22 | 24/M           | <i>Camellia sinensis</i>                                                                                                                                                                                                                                                                                                                                                                                               | 1/d x 2m              | Immunity,<br>body weight,<br>tonic,<br>antioxidant | Yes [11–12]                    | None                                          | No drug + E, FO,<br>PO, VM  | Nausea              | Possible [57]                                                       |
| 23 | 40/F           | <i>Urtica dioica</i>                                                                                                                                                                                                                                                                                                                                                                                                   | 3/d x 2m              | Body weight,<br>immunity                           | Limited<br>evidence<br>[23–24] | None                                          | No drug + AA, FO,<br>PO, VM | "Easy"<br>sweating  | Possible [58]                                                       |
| 24 | 48/F           | <i>Arthrospira<br/>platensis</i> [alga]                                                                                                                                                                                                                                                                                                                                                                                | 1/d x 5m              | Antioxidant,<br>immunity                           | Yes [25–26]                    | Migraine                                      | Analgesics + V              | Insomnia            | Uncertain                                                           |
| 25 | 47/M           | <i>Auricularia<br/>auricula-judae</i><br>[fungus], <i>Coffea<br/>arabica</i> , <i>Fallopia<br/>japonica</i> /<br><i>Polygonum<br/>cuspidatum</i> ,<br><i>Ginkgo biloba</i> ,<br><i>Panicum<br/>miliaceum</i> ,<br><i>Polyporus<br/>umbellatus</i><br>[fungus],<br><i>Saccharomyces<br/>cerevisiae</i><br>[yeast], <i>Serenoa<br/>repens</i> ,<br><i>Trigonella<br/>foenum-<br/>graecum</i> ,<br><i>Ziziphus jujuba</i> | 2/d x<br>12m          | Hair/skin,<br>energy                               | Yes [11, 27–<br>28]            | HCHO                                          | None                        | Discomfort          | Unassessable<br>due to the<br>presence of<br>several<br>ingredients |
| 26 | 57/M           | <i>Cucurbita<br/>maxima</i> ,<br><i>Vaccinium<br/>macrocarpon</i>                                                                                                                                                                                                                                                                                                                                                      | 2/d x 2m              | Urinary tract                                      | Yes [11]                       | HCHO,<br>hypertension                         | Benazepril                  | Discomfort          | Unassessable                                                        |
| 27 | 45/M           | <i>Saccharomyces<br/>cerevisiae</i> [yeast]                                                                                                                                                                                                                                                                                                                                                                            | 3/d x 3m              | Hair/skin                                          | Yes [29–30]                    | None                                          | None                        | Skin<br>problems    | Unlikely<br>[Allergy?]                                              |
| 28 | 42/M           | <i>Asparagus<br/>officinalis</i> ,<br><i>Cynara<br/>scolymus</i> ,<br><i>Cichorium<br/>intybus</i> (inulin),<br><i>Plantago<br/>psyllium</i>                                                                                                                                                                                                                                                                           | 1/d x 2w              | Constipation                                       | Yes [11]                       | None                                          | No drug + M                 | Diarrhoea           | Possible [59]                                                       |
| 29 | 64/F           | <i>Nigella sativa</i>                                                                                                                                                                                                                                                                                                                                                                                                  | 1/d x 1m              | Immunity,<br>HCHO                                  | Yes [31–32]                    | None                                          | No drug + M                 | Mild<br>flatulence  | Unlikely                                                            |
| 30 | 42/F           | <i>Cynara scolymus</i>                                                                                                                                                                                                                                                                                                                                                                                                 | 1/d x 6m              | Digestion,<br>HCHO                                 | Yes [11–12]                    | HCHO                                          | No drug + VM                | Nausea              | Possible [59]                                                       |
| 31 | 62/F           | <i>Glycine max</i>                                                                                                                                                                                                                                                                                                                                                                                                     | 3/d x 3m              | Menopause                                          | Yes [11]                       | Allergy                                       | No drug + FO, M             | Gastric<br>problems | Possible [45–<br>46]                                                |
| 32 | 31/M           | <i>Matricaria<br/>recutita</i> , <i>Melissa<br/>officinalis</i> ,<br><i>Valeriana<br/>officinalis</i>                                                                                                                                                                                                                                                                                                                  | 3/d x 6m              | Sleeping and<br>mood<br>problems                   | Yes [11–12]                    | Migraine,<br>peptic ulcer,<br>sleep disorders | None                        | Dizziness           | Possible [60]                                                       |

(Continued)



Table 3. (Continued)

| ID  | Age/<br>Gender | Botanical/s^                                                                                                                       | Dose<br>and<br>period | Reasons for<br>use                              | "Suitability"   | Present or<br>past main<br>health<br>problems        | Conventional<br>drugs + FS                                                      | Adverse<br>effects          | Causality                                    |
|-----|----------------|------------------------------------------------------------------------------------------------------------------------------------|-----------------------|-------------------------------------------------|-----------------|------------------------------------------------------|---------------------------------------------------------------------------------|-----------------------------|----------------------------------------------|
| 33  | 56/M           | <i>Brassica oleracea</i>                                                                                                           | 2/d x 2m              | Body weight                                     | Unlikely        | Hypertension, sleeping disorders, chronic bronchitis | None                                                                            | Gastric problems            | Unlikely                                     |
| 34  | 29/M           | <i>Saccharomyces cerevisiae</i> [yeast]                                                                                            | 2/d x 3m              | Hair/skin                                       | Yes [29–30]     | None                                                 | None                                                                            | Gastric problems, diarrhoea | Unlikely                                     |
| 35A | 64/F           | <i>Cynara scolymus</i>                                                                                                             | 1/d x 5d              | Body weight, HCHO, digestion                    | Yes [12]        | Hypertension, asthma, diabetes, joint/ bone pain     | Beclometason [spray], Formoterol [spray], Metformin, Thyroxin + VM, E (lactase) | Diarrhoea                   | Possible [22]                                |
| 35B |                | <i>Camellia sinensis</i> ,<br><i>Crataegus spp.</i> ,<br><i>Olea europaea</i> (olive oil),<br><i>Viscum album</i>                  | Unknown               |                                                 |                 |                                                      |                                                                                 |                             | Possible (olive oil)                         |
| 36  | 27/F           | <i>Olea europaea</i> (olive oil)                                                                                                   | 1/d x 5w              | HCHO, body weight, digestion, blood circulation | Yes [11–12]     | HCHO                                                 | No drug + FO, VM                                                                | Diarrhoea                   | Possible [22]                                |
| 37  | 65/M           | <i>Ginkgo biloba</i>                                                                                                               | 4/w x 12m             | Memory                                          | Yes [11–12]     | HCHO                                                 | Iron supplementation, V                                                         | Insomnia                    | Possible [61]                                |
| 38  | 66/F           | <i>Ginkgo biloba</i>                                                                                                               | 5/w x 6m              | Memory                                          | Yes [11–12]     | None                                                 | None                                                                            | Constipation                | Possible [62]                                |
| 39  | 23/M           | <i>Paullinia cupana</i>                                                                                                            | 1/d x 2m              | Energy                                          | Yes [11–12]     | None                                                 | None                                                                            | Diarrhoea                   | Unlikely                                     |
| 40  | 19/M           | <i>Paullinia cupana</i>                                                                                                            | 2/w x 3w              | Energy, urinary tract                           | Yes [11–12]     | None                                                 | None                                                                            | Constipation                | Unlikely                                     |
| 41  | 71/M           | <i>Cynara scolymus</i>                                                                                                             | 2/w x 4w              | Antioxidant, immunity, digestion                | Yes [11–12]     | HCHO, hypertension                                   | Metopopol, Ramipril                                                             | Gastric problems            | Possible [59]                                |
| 42A | 31/M           | <i>Peumus boldus</i>                                                                                                               | 2/w x 1w              | Digestion                                       | Yes [11–12]     | None                                                 | None                                                                            | Constipation                | Unlikely                                     |
| 42B |                | <i>Linum usitatissimum</i>                                                                                                         | 2/w x 3w              | Digestion                                       | Yes [11–12]     |                                                      |                                                                                 | Diarrhoea                   | Unlikely at the dose used                    |
| 43  | 66/F           | <i>Panax ginseng</i>                                                                                                               | 1/w x 6w              | HCHO, relaxing, hair/skin                       | Yes [33–34]     | HCHO, cataract                                       | None                                                                            | Constipation                | Possible [63]                                |
| 44  | 66/M           | <i>Olea europaea</i>                                                                                                               | 5/w x 2w              | Hair/skin                                       | Unlikely        | None                                                 | None                                                                            | Gastric problems            | Unlikely                                     |
| 45  | 41/F           | <i>Oenothera biennis</i>                                                                                                           | 2/d X 3m              | Immunity, hair/skin                             | Yes [11–12]     | Hypertension, allergy                                | Antihypertensive drugs, Thyroxin                                                | Mild eructation             | Possible [64]                                |
| 46  | 57/F           | <i>Camellia sinensis</i> , <i>Paullinia cupana</i>                                                                                 | 2/d x 2m              | Body weight, digestion, energy/tonic            | Yes [11–12, 35] | None                                                 | No drug                                                                         | Insomnia                    | Probable due to the content in caffeine [35] |
| 47  | 43/F           | <i>Cassia angustifolia</i> ,<br><i>Illicium verum</i> ,<br><i>Raphanus sativus</i> var. <i>niger</i> ,<br><i>Rhamnus purshiana</i> | 1/d x 4w              | Body weight, digestion                          | Yes [11]        | Hypertension, migraine                               | No drug                                                                         | Diarrhoea                   | Possible [65–66]                             |

(Continued)

Table 3. (Continued)

| ID | Age/<br>Gender | Botanical/s^                                                                 | Dose<br>and<br>period | Reasons for<br>use         | "Suitability" | Present or<br>past main<br>health<br>problems            | Conventional<br>drugs + FS                                     | Adverse<br>effects | Causality                                                      |
|----|----------------|------------------------------------------------------------------------------|-----------------------|----------------------------|---------------|----------------------------------------------------------|----------------------------------------------------------------|--------------------|----------------------------------------------------------------|
| 48 | 47/F           | <i>Rhamnus purshiana</i>                                                     | 1/d x 9m              | Digestion                  | Yes [11]      | Chronic neutropenia, glaucoma, vascular problems         | Bimatoprost, Timolol                                           | Gastric problems   | Possible [66]                                                  |
| 49 | 36M            | <i>Valeriana officinalis</i>                                                 | 4/w x 5m              | Sleeping, relaxing, mood   | Yes [11–12]   | None                                                     | None                                                           | Insomnia           | Unlikely but described [67]                                    |
| 50 | 61/M           | <i>Punica granatum</i>                                                       | 2/d x 12m             | Prostate                   | Yes [36]      | Cancer                                                   | None                                                           | Diarrhoea          | Possible for high intake or previous intestinal disorders [68] |
| 51 | 46/F           | <i>Cassia angustifolia</i> ,<br><i>Raphanus sativus</i><br>var. <i>niger</i> | 1/d x 2m              | Digestion                  | Yes [11]      | None                                                     | None                                                           | Flatulence         | Possible [65]                                                  |
| 52 | 69/F           | <i>Pimpinella anisum</i>                                                     | 2/d x 12m             | Digestion                  | Yes [11–12]   | Hypertension, osteoporosis                               | Amlodipine                                                     | Diarrhoea          | Uncertain (associated with allergic reaction)                  |
| 53 | 61/F           | <i>Valeriana officinalis</i>                                                 | 2/d x 12m             | Sleeping, relaxing, mood   | Yes [11–12]   | HCHO, heart disease, muscles, joint/ bone pain, cataract | Alprazolam, Simvastatin                                        | Constipation       | Possible— abdominal cramps have been described [69]            |
| 54 | 72/F           | <i>Valeriana officinalis</i>                                                 | 1/d x 8m              | Sleeping, memory, relaxing | Yes [11–12]   | Cancer, joint/ bone pain                                 | None                                                           | Migraine           | Possible [67]                                                  |
| 55 | 36/F           | <i>Panax ginseng</i> ,<br><i>Paullinia cupana</i>                            | 1/d x 3m              | Energy/tonic               | Yes [11–12]   | None                                                     | Birth-control pill                                             | Tachycardia        | Probable [70]                                                  |
| 56 | 39/M           | <i>Passiflora incarnata</i>                                                  | 1/d x 10m             | Sleeping, relaxing         | Yes [11–12]   | Fatigue; insomnia                                        | None                                                           | Insomnia           | Unlikely                                                       |
| 57 | 63/M           | <i>Malus domestica</i> ,<br><i>Citrus limon</i>                              | 2/d x 4m              | Constipation               | Unlikely      | HCHO, heart disease, hypertension                        | Quinapril/ Hydrochlorothiazide, Diosmin/Esperidin [flavonoids] | Gastric problems   | Unlikely                                                       |
| 58 | 50/F           | <i>Paullinia cupana</i>                                                      | 1/d x 2w              | Energy/tonic               | Yes [11–12]   | Hypertension, anxiety, depression                        | Fluoxetine                                                     | Tachycardia        | Probable [70]                                                  |
| 59 | 49/F           | <i>Valeriana officinalis</i>                                                 | 1/d x 3m              | Relaxing                   | Yes [11–12]   | HCHO; hypertension, migraine, allergy, anxiety           | No drug + SI, VM                                               | Flatulence         | Possible— abdominal cramps have been described [69]            |
| 60 | 64/F           | <i>Oenothera biennis</i>                                                     | 3/d x 9m              | Breast nodule              | Yes [12]      | Hypertension, allergy                                    | Valsartan + AA, V, SI                                          | Cystitis           | Unlikely                                                       |
| 61 | 60/F           | <i>Harpagophytum procumbens</i>                                              | 3/d x 1m              | Joints/bones               | Yes [11–12]   | Bone/joint pain, low back pain                           | None                                                           | Gastric problems   | Possible [71]                                                  |
| 62 | 42/M           | <i>Allium sativum</i>                                                        | 3/d x 2m              | Immunity                   | Yes [37]      | Asthma, renal problems                                   | Amoxicillin/ clavulanic acid                                   | Allergic symptoms  | Possible (quite rare)                                          |

(Continued)

Table 3. (Continued)

| ID  | Age/<br>Gender | Botanical/s^                                      | Dose<br>and<br>period | Reasons for<br>use              | "Suitability"    | Present or<br>past main<br>health<br>problems                                                  | Conventional<br>drugs + FS                                 | Adverse<br>effects   | Causality                                                                |
|-----|----------------|---------------------------------------------------|-----------------------|---------------------------------|------------------|------------------------------------------------------------------------------------------------|------------------------------------------------------------|----------------------|--------------------------------------------------------------------------|
| 63  | 49/M           | <i>Taraxacum officinale</i>                       | 3/d x 8m              | Digestion, diuretic             | Yes [11–12]      | Liver disease                                                                                  | None                                                       | Diarrhoea            | Unlikely                                                                 |
| 64  | 42/M           | <i>Valeriana officinalis</i>                      | 2/d x 4m              | Sleeping, relaxing              | Yes [11–12]      | Liver disease, gallbladder inflammation                                                        | None                                                       | Insomnia             | Unlikely but described [67]                                              |
| 65A | 38/F           | <i>Equisetum arvense</i>                          | 2/d x 4m              | Hair/skin, urinary tract        | Yes [11–12]      | Muscle and bone pain, migraine, ulcer, anxiety and depression, urinary problems                | Trimethoprim, Sulfamethoxazol, Ibuprofen                   | Constipation         | Possible—gastrointestinal complaints have been reported [72]             |
| 65B |                | <i>Taraxacum officinale</i>                       | 1/d x 4m              | Urinary tract                   | Yes [11–12]      |                                                                                                |                                                            | Dizziness            | Unlikely even though described for interaction with acetylsalicylic acid |
| 66  | 46/F           | <i>Lepidium meyenii</i>                           | 2/d x 3m              | Urinary tract [kidney stones]   | Yes [38]         | Allergy, kidney stones                                                                         | Ibuprofen, Metamizole, Potassium citrate                   | Diarrhoea            | Unlikely                                                                 |
| 67  | 54/M           | <i>Echinacea angustifolia</i>                     | 3/d x 1m              | Flu cold                        | Yes [12]         | HCHO, hypertension                                                                             | Metformin, Olmesartan/ Medoxomil                           | Increased glycemia   | Unlikely                                                                 |
| 68  | 61/M           | <i>Echinacea spp</i>                              | 1/d x 2m              | Sinusitis                       | Yes (cold) [12]  | HCHO, anxiety and depression                                                                   | Atorvastatin, Enalapril                                    | Gastric problems     | Possible [73]                                                            |
| 69A | 30/M           | <i>Allium sativum</i>                             | 1/d x 3m              | Immunity, flu cold              | Yes [37]         | Allergy                                                                                        | None                                                       | Gastric problems     | Possible [74]                                                            |
| 69B |                | <i>Valeriana officinalis</i>                      | 2/d x 12m             | Sleeping                        | Yes [11–12]      | Allergy                                                                                        | None                                                       | Migraine             | Possible [67]                                                            |
| 70  | 29/F           | <i>Foeniculum vulgare</i>                         | 3/d x 2m              | Body weight, urinary tract      | Yes [12]         | Asthma, allergy                                                                                | Beclometasone, Drospirenone/ Ethinyl estradiol, Salbutamol | Difficult swallowing | Possible since reported in cases of allergy                              |
| 71  | 35/M           | <i>Paullinia cupana</i>                           | 1d x 5m               | Energy/tonic, mood              | Yes [11–12]      | Heart disease                                                                                  | None                                                       | Dizziness            | Possible [75]                                                            |
| 72  | 52/M           | <i>Aloe barbadensis, Harpagophytum procumbens</i> | 2d x 4w               | Joints/bones                    | Yes [11–12]      | Muscle, bone/ joint pain                                                                       | None                                                       | Unspecified          | Unassessable                                                             |
| 73  | 26/F           | <i>Panax ginseng</i>                              | 1d x 2w               | Energy/tonic                    | Yes [11–12]      | None                                                                                           | No drug + Inositol, folic acid                             | Tachycardia          | Possible [76]                                                            |
| 74  | 61/F           | <i>Cyamopsis tetragonoloba</i>                    | 20/m x ?              | Body weight, energy/tonic       | Unlikely [39–40] | Diabetes                                                                                       | None                                                       | Nausea               | Possible [40]                                                            |
| 75  | 69/M           | <i>Ginkgo biloba</i>                              | 2/d x ?               | Joints/bones, blood circulation | Yes [11]         | Diabetes, heart disease, hypertension, liver disease, stroke, gallbladder inflammation/ stones | Acenocumarole, Captopril, Trimetazidine                    | Insomnia             | Possible [77]                                                            |

(Continued)

Table 3. (Continued)

| ID | Age/<br>Gender | Botanical/s <sup>^</sup>                                                                                                                                         | Dose<br>and<br>period | Reasons for<br>use        | "Suitability" | Present or<br>past main<br>health<br>problems                                                                                                                                        | Conventional<br>drugs + FS                              | Adverse<br>effects                            | Causality                                                           |
|----|----------------|------------------------------------------------------------------------------------------------------------------------------------------------------------------|-----------------------|---------------------------|---------------|--------------------------------------------------------------------------------------------------------------------------------------------------------------------------------------|---------------------------------------------------------|-----------------------------------------------|---------------------------------------------------------------------|
| 76 | 21/F           | <i>Ginkgo biloba</i>                                                                                                                                             | 1/d x ?               | Memory                    | Yes [11]      | None                                                                                                                                                                                 | No drug<br>+ Polyphenols                                | Dizziness                                     | Possible [78]                                                       |
| 77 | 19/M           | <i>Ginkgo biloba</i>                                                                                                                                             | 2/d x 14d             | Memory                    | Yes [11]      | Hypertension                                                                                                                                                                         | Captopril                                               | Insomnia                                      | Possible [77]                                                       |
| 78 | 41/F           | <i>Arthrospira<br/>platensis</i> [alga],<br><i>Hippophae<br/>rhamnoides</i>                                                                                      | 1/d x ?               | Immunity,<br>energy/tonic | Yes [11]      | Anemia,<br>arrhythmia                                                                                                                                                                | None                                                    | Gastric<br>problems,<br>nausea                | Unlikely                                                            |
| 79 | 50/M           | <i>Camellia sinensis</i>                                                                                                                                         | 1/d x 2w              | Immunity                  | Yes [41]      | HCHO,<br>diabetes,<br>migraine                                                                                                                                                       | None                                                    | Diarrhoea,<br>gastric<br>problems<br>(nausea) | Unlikely                                                            |
| 80 | 49/M           | <i>Camellia sinensis</i>                                                                                                                                         | 1/d x 2w              | Immunity                  | Yes [41]      | Migraine, ulcer                                                                                                                                                                      | None                                                    | Diarrhoea,<br>gastric<br>problems<br>(nausea) | Unlikely                                                            |
| 81 | 53/F           | <i>Betula spp.</i> ,<br><i>Equisetum<br/>arvense</i> ,<br><i>Juniperus<br/>communis</i> ,<br><i>Pimpinella<br/>anisum</i> ,<br><i>Vaccinium vitis-<br/>idaea</i> | 3/d x 20d             | Urinary tract             | Yes [11]      | HCHO,<br>asthma,<br>diabetes, heart<br>disease,<br>hypertension,<br>liver disease,<br>chronic<br>bronchitis,<br>cataract,<br>osteoporosis,<br>allergy, cancer,<br>Basedow<br>disease | Enalapril,<br>Metformin,<br>Nicergoline,<br>Simvastatin | Gastric<br>problems                           | Unassessable<br>due to the<br>presence of<br>several<br>ingredients |
| 82 | 35/M           | <i>Aloe vera</i>                                                                                                                                                 | 3/w x<br>12m          | Joints/bones              | Yes [42]      | None                                                                                                                                                                                 | None                                                    | Diarrhoea                                     | Probable<br>[laxative effect]                                       |

<sup>^</sup> according to: for plants US Department of Agriculture ([plants.usda.gov](http://plants.usda.gov)); for algae [www.algaebase.org](http://www.algaebase.org); for fungi [www.indexfungorum.org](http://www.indexfungorum.org)  
? unknown

AA= Supplement containing amino acids; FO= Fish Oil; E= Enzymes; HCHO= Hypercholesterolemia; M= Supplement containing minerals; PE= Prebiotics; PO= Probiotics; SI= Soy isoflavones; V= Supplement containing vitamins; VM= Supplement containing vitamins and minerals; d= day; m= month; w= week

doi:10.1371/journal.pone.0150089.t003

adverse effects being associated with the botanical used and 56 out of 87 (64%) cases were defined as possible (52) or probable (4) according to 1) the daily dose and period of intake, and 2) the frequency and strength of scientific evidence. The most significant references are reported in Table 3. The association was not confirmed for 28 cases. The interaction with conventional drugs was considered possible in three cases (ID 01, 15 and 17B). It is important to underline that comparing the list of conventional drugs used with the column “present or past main health problems”, there are several incongruences; this is due to the self-reported nature of information collected.

The frequency of self-reported adverse effects in relation to each botanical is reported in Table 4; the total number of botanical ingredients contained in PFS with reported adverse effects was 72 and the total counts were 144. In most cases (46%), the PFS involved contained one ingredient. Forty botanicals (55.6% of the total) were associated with a single adverse event and 80% of them were included in PFS containing two or more ingredients. Considering the

**Table 4. Botanical ingredients contained in PFS with reported adverse effects.**

| Latin name <sup>^</sup>                  | Common name <sup>^</sup>                          | Number of counts  |   |    |    |    |       |                       |            |            |
|------------------------------------------|---------------------------------------------------|-------------------|---|----|----|----|-------|-----------------------|------------|------------|
|                                          |                                                   | Total for country |   |    |    |    | TOTAL | 1<br>ING <sup>a</sup> | 2–3<br>ING | ≥ 4<br>ING |
|                                          |                                                   | FI                | D | IT | RO | SP |       |                       |            |            |
| <i>Valeriana officinalis</i>             | Garden valerian                                   |                   | 1 |    |    | 7  | 8     | 7                     | 1          |            |
| <i>Camellia sinensis</i>                 | Tea                                               | 3                 | 1 |    | 2  | 1  | 7     | 4                     | 2          | 1          |
| <i>Ginkgo biloba</i>                     | Maidenhair tree                                   |                   | 3 |    | 3  |    | 6     | 5                     |            | 1          |
| <i>Paullinia cupana</i>                  | Guarana                                           |                   | 2 | 1  |    | 3  | 6     | 4                     | 2          |            |
| <i>Cynara scolymus</i>                   | Globe artichoke                                   | 1                 | 4 |    |    |    | 5     | 3                     |            | 2          |
| <i>Echinacea angustifolia/purpurea</i>   | Black Samson Echinacea/ Eastern purple coneflower | 3                 |   |    |    | 2  | 5     | 5                     |            |            |
| <i>Olea europaea</i>                     | Olive                                             | 2                 | 3 |    |    |    | 5     | 3                     | 1          | 1          |
| <i>Oryza sativa + Monascus purpureus</i> | Red rice                                          | 5                 |   |    |    |    | 5     | 5                     |            |            |
| <i>Panax ginseng</i>                     | Chinese ginseng                                   | 2                 | 1 | 1  |    | 1  | 5     | 2                     | 3          |            |
| <i>Equisetum arvense</i>                 | Field horsetail                                   | 2                 |   |    | 1  | 1  | 4     | 2                     |            | 2          |
| <i>Allium sativum</i>                    | Cultivated garlic                                 |                   |   |    |    | 3  | 3     | 3                     |            |            |
| <i>Foeniculum vulgare</i>                | Sweet fennel                                      | 2                 |   | 1  |    |    | 3     | 1                     |            | 2          |
| <i>Glycine max</i>                       | Soybean                                           | 2                 | 1 |    |    |    | 3     | 2                     |            | 1          |
| <i>Saccharomyces cerevisiae</i>          | Yeast                                             |                   | 3 |    |    |    | 3     | 2                     |            | 1          |
| <i>Aloe barbadensis/vera</i>             | Barbados aloe                                     |                   |   | 1  |    | 1  | 2     | 1                     | 1          |            |
| <i>Arthrospira platensis</i>             | Spirulina                                         |                   | 1 |    | 1  |    | 2     | 1                     | 1          |            |
| <i>Betula spp.</i>                       | Birch                                             | 1                 |   |    | 1  |    | 2     |                       |            | 2          |
| <i>Cassia angustifolia</i>               | Alexandrian senna                                 |                   |   |    |    | 2  | 2     |                       | 1          | 1          |
| <i>Citrus aurantium</i>                  | Sour orange                                       | 2                 |   |    |    |    | 2     |                       |            | 2          |
| <i>Crataegus spp.</i>                    | Hawthorn                                          | 1                 | 1 |    |    |    | 2     |                       |            | 2          |
| <i>Cichorium intybus</i>                 | Chicory                                           | 1                 | 1 |    |    |    | 2     |                       |            | 2          |
| <i>Gossypium spp.</i>                    | Cotton                                            | 2                 |   |    |    |    | 2     |                       | 2          |            |
| <i>Harpagophytum procumbens</i>          | Devil's claw                                      |                   |   | 1  |    | 1  | 2     | 1                     | 1          |            |
| <i>Melissa officinalis</i>               | Common balm                                       | 1                 | 1 |    |    |    | 2     |                       | 2          |            |
| <i>Oenothera biennis</i>                 | Common evening primrose                           |                   | 1 |    |    | 1  | 2     | 2                     |            |            |
| <i>Pimpinella anisum</i>                 | Anise burnet saxifrage                            |                   |   |    | 1  | 1  | 2     | 1                     |            | 1          |
| <i>Plantago psyllium</i>                 | Psyllium                                          | 1                 | 1 |    |    |    | 2     |                       | 1          | 1          |
| <i>Raphanus sativus var. niger</i>       | Spanish black radish                              |                   |   |    |    | 2  | 2     |                       | 1          | 1          |
| <i>Rhamnus purshiana</i>                 | Cascara buckthorn                                 |                   |   |    |    | 2  | 2     | 1                     |            | 1          |
| <i>Taraxacum officinale</i>              | Common dandelion                                  |                   |   |    |    | 2  | 2     | 2                     |            |            |
| <i>Urtica dioica</i>                     | Stinging nettle                                   | 2                 |   |    |    |    | 2     | 1                     |            | 1          |
| <i>Zingiber officinale</i>               | Garden ginger                                     | 2                 |   |    |    |    | 2     | 1                     | 1          |            |
| <i>Achillea millefolium</i>              | Common yarrow                                     | 1                 |   |    |    |    | 1     |                       |            | 1          |
| <i>Arctium lappa</i>                     | Greater burdock                                   | 1                 |   |    |    |    | 1     |                       |            | 1          |
| <i>Asparagus officinalis</i>             | Garden asparagus                                  |                   | 1 |    |    |    | 1     |                       |            | 1          |
| <i>Auricularia auricula-judae</i>        | Jew's ear                                         |                   | 1 |    |    |    | 1     |                       |            | 1          |
| <i>Brassica oleracea</i>                 | Cabbage                                           |                   | 1 |    |    |    | 1     | 1                     |            |            |
| <i>Calendula officinalis</i>             | Pot marigold                                      | 1                 |   |    |    |    | 1     |                       |            | 1          |
| <i>Citrus limon</i>                      | Lemon                                             |                   |   |    |    | 1  | 1     |                       | 1          |            |
| <i>Coffea arabica</i>                    | Arabian coffee                                    |                   | 1 |    |    |    | 1     |                       |            | 1          |
| <i>Cucurbita maxima</i>                  | Winter squash                                     |                   | 1 |    |    |    | 1     |                       | 1          |            |
| <i>Cyamopsis tetragonoloba</i>           | Guar                                              |                   |   | 1  |    |    | 1     | 1                     |            |            |

(Continued)

Table 4. (Continued)

| Latin name <sup>^</sup>          | Common name <sup>^</sup> | Number of counts  |    |    |    |    |     |       |                    |         |         |
|----------------------------------|--------------------------|-------------------|----|----|----|----|-----|-------|--------------------|---------|---------|
|                                  |                          | Total for country |    |    |    |    |     | TOTAL | 1 ING <sup>a</sup> | 2–3 ING | ≥ 4 ING |
|                                  |                          | FI                | D  | IT | RO | SP | UK  |       |                    |         |         |
| <i>Daucus carota</i>             | Carrot                   | 1                 |    |    |    |    |     | 1     |                    | 1       |         |
| <i>Dunaliella salina</i>         | "Green alga"*            | 1                 |    |    |    |    |     | 1     |                    | 1       |         |
| <i>Fallopia japonica</i>         | Japanese knotweed        |                   | 1  |    |    |    |     | 1     |                    | 1       |         |
| <i>Filipendula ulmaria</i>       | Queen of meadow          | 1                 |    |    |    |    |     | 1     |                    | 1       |         |
| <i>Fucus vesiculosus</i>         | Bladder wrack            | 1                 |    |    |    |    |     | 1     |                    | 1       |         |
| <i>Hibiscus rosa-sinensis</i>    | Shoeblackplant           | 1                 |    |    |    |    |     | 1     |                    | 1       |         |
| <i>Hippophae rhamnoides</i>      | Seaberry                 |                   |    |    | 1  |    |     | 1     | 1                  |         |         |
| <i>Illicium verum</i>            | Staranise tree           |                   |    |    |    | 1  |     | 1     |                    | 1       |         |
| <i>Juniperus communis</i>        | Common juniper           |                   |    |    | 1  |    |     | 1     |                    | 1       |         |
| <i>Lepidium meyenii</i>          | Maca                     |                   |    |    |    | 1  |     | 1     | 1                  |         |         |
| <i>Linum usitatissimum</i>       | Common flax              |                   | 1  |    |    |    |     | 1     | 1                  |         |         |
| <i>Malus domestica</i>           | Apple                    |                   |    |    |    | 1  |     | 1     | 1                  |         |         |
| <i>Matricaria recutita</i>       | German chamomile         |                   | 1  |    |    |    |     | 1     | 1                  |         |         |
| <i>Nigella sativa</i>            | Black cumin              |                   | 1  |    |    |    |     | 1     | 1                  |         |         |
| <i>Panicum miliaceum</i>         | Proso millet             |                   | 1  |    |    |    |     | 1     |                    | 1       |         |
| <i>Passiflora incarnata</i>      | Purple passionflower     |                   |    |    |    | 1  |     | 1     | 1                  |         |         |
| <i>Picea spp.</i>                | Spruce                   | 1                 |    |    |    |    |     | 1     |                    | 1       |         |
| <i>Peumus boldus</i>             | Boldo                    |                   | 1  |    |    |    |     | 1     | 1                  |         |         |
| <i>Polyporus umbellatus</i>      | Umbrella polypore        |                   | 1  |    |    |    |     | 1     |                    | 1       |         |
| <i>Prunus africana</i>           | Red stinkwood            | 1                 |    |    |    |    |     | 1     | 2                  |         |         |
| <i>Punica granatum</i>           | Pomegranate              |                   |    |    |    | 1  |     | 1     | 1                  |         |         |
| <i>Ribes nigrum</i>              | European blackcurrant    | 1                 |    |    |    |    |     | 1     |                    | 1       |         |
| <i>Serenoa repens</i>            | Saw palmetto             |                   | 1  |    |    |    |     | 1     |                    | 1       |         |
| <i>Spinacia oleracea</i>         | Spinach                  | 1                 |    |    |    |    |     | 1     |                    | 1       |         |
| <i>Trigonella foenum-graecum</i> | Sicklefruit fenugreek    |                   | 1  |    |    |    |     | 1     |                    | 1       |         |
| <i>Triticum spp.</i>             | Wheat                    | 1                 |    |    |    |    |     | 1     |                    | 1       |         |
| <i>Vaccinium macrocarpon</i>     | Cranberry                |                   | 1  |    |    |    |     | 1     | 1                  |         |         |
| <i>Vaccinium vitis idaea</i>     | Cowberry/lingonberry     |                   |    |    | 1  |    |     | 1     |                    | 1       |         |
| <i>Viscum album</i>              | European mistletoe       |                   | 1  |    |    |    |     | 1     |                    | 1       |         |
| <i>Ziziphus jujuba</i>           | Common jujube            |                   | 1  |    |    |    |     | 1     |                    | 1       |         |
| <b>Total counts</b>              |                          | 48                | 42 | 6  | 12 | 35 | 1   | 144   | 66                 | 28      | 50      |
| <b>Percentage of the total</b>   |                          | 33                | 29 | 4  | 8  | 24 | 0.7 | 100   | 45.8               | 19.4    | 34.7    |

<sup>^</sup> according to: for plants US Department of Agriculture ([plants.usda.gov](http://plants.usda.gov)); for algae [www.algaebase.org](http://www.algaebase.org); for fungi [www.indexfungorum.org](http://www.indexfungorum.org)

\* no common name

FI = Finland; D = Germany; IT = Italy; RO = Romania; SP = Spain; UK = United Kingdom

<sup>a</sup>ING = Ingredients (number of botanicals contained in the product associated with the adverse effect)

doi:10.1371/journal.pone.0150089.t004

most prevalent botanicals associated with adverse effects, 14 were associated with 68 reported adverse effects, representing the 47.2% of the total counts. In particular, eight were due to *Valeriana officinalis* (seven of them in Spain), seven to *Camellia sinensis*, six to *Ginkgo biloba* and six to *Paullinia cupana*.

The association of adverse effects with different organ systems is listed in [Table 5](#).

**Table 5. Distribution of adverse effects among the different organ systems.**

| System                  | Number of reports     | Percentage of total |
|-------------------------|-----------------------|---------------------|
| Gastrointestinal system | 52                    | 59.8                |
| Nervous system          | 15                    | 17.2                |
| Cardiovascular system   | 4                     | 4.6                 |
| Skin and hair           | 3                     | 3.4                 |
| Hepatotoxicity          | 2                     | 2.3                 |
| Urinary tract           | 2                     | 2.3                 |
| Immune system (Allergy) | 2                     | 2.3                 |
| Other                   | 7                     | 8.0                 |
| <b>Total</b>            | <b>87<sup>a</sup></b> | <b>100</b>          |

<sup>a</sup> The total number of adverse effects reported is 87 since 5 out of 82 consumers complained about two PFSs

doi:10.1371/journal.pone.0150089.t005

Approximately 60% of adverse events were related to the gastrointestinal tract, distributed between gastric problems (where nausea was the most reported symptom) and intestinal effects (mainly diarrhoea).

The nervous system was the second most affected area with nine cases of insomnia, four of dizziness and two of migraine; the cardiovascular system was reported in four cases of tachycardia. The stimulating effects of botanicals containing caffeine can explain the insomnia and tachycardia reported by consumers 13, 46, 55, and 58, but in other cases, the effects were unexpected. An example is the case of insomnia due to *Valeriana officinalis* (ID 49 and ID 64), which is the opposite of the usual physiological effect, associated with this botanical [11–12]. *Ginkgo biloba* was involved in three cases of insomnia and one of dizziness.

Hair and skin were affected in three cases. A case of hair loss was reported by consumer 10, taking *Equisetum arvense* 3 units/day for 12 months. This adverse effect could be associated with the reported effect of *E. arvense* in reducing the bioavailability of thiamine after chronic consumption [50]. On the other hand, the role of thiamine deficiency in hair loss has been hypothesised but insufficiently documented [79]. Hepatotoxicity, defined as an increased level of liver enzymes, was reported by two consumers using red rice (*Oryza sativa* fermented by the fungus *Monascus purpureus*). Red rice is widely used in mild hypercholesterolemia, as a "natural" alternative to statins. Several side effects have been described in consumers using this ingredient, such as headache, dizziness, heartburn, gas and digestive tract discomfort, and it should be used cautiously by people suffering from liver disease and those at risk of it [52–53]. Allergies to *Allium sativum* and to a PFS containing *Melissa officinalis* and *Olea europaea* were reported by two consumers (ID 62 and ID 21, respectively).

A difficulty in swallowing was reported by a consumer (ID 19), using red rice to reduce blood cholesterol. Even though this effect has not been previously associated with red rice, there are some reports concerning the statins (having similar biological activity) for which the impaired swallowing was considered among possible symptoms of muscle degeneration [55].

Table 6 compares the plants most prevalently involved in adverse effects as reported by the PlantLIBRA project, in relation to: 1) data from the literature [9], 2) reports from Poisons Centers [80]; and finally from this study.

It is important to underline that the review from the literature did not separate cases due to botanicals used as food supplements or traditional medicines as was the case in the other two data reviews. Moreover, due to the very high number of botanicals in PFS, the review on the scientific literature included "only" 66 among the most frequently consumed botanicals. The

**Table 6. Plants most frequently involved in adverse effects as reported from three sources in the PlantLIBRA project.**

| Review from literature [9]   |                | Data from Poisons Centers    |                | Self-reported adverse effects (PFS Consumer survey) |                |
|------------------------------|----------------|------------------------------|----------------|-----------------------------------------------------|----------------|
| Plant                        | % <sup>a</sup> | Plant                        | % <sup>a</sup> | Plant                                               | % <sup>a</sup> |
| <i>Glycine max</i>           | 19.3           | <i>Valeriana officinalis</i> | 14.3           | <i>Valeriana officinalis</i>                        | 9.2            |
| <i>Glycyrrhiza glabra</i>    | 12.2           | <i>Camellia sinensis</i>     | 6.2            | <i>Camellia sinensis</i>                            | 8.0            |
| <i>Camellia sinensis</i>     | 8.7            | <i>Melissa officinalis</i>   | 4.3            | <i>Ginkgo biloba</i>                                | 6.9            |
| <i>Ginkgo biloba</i>         | 8.5            | <i>Mentha x piperita</i>     | 4.3            | <i>Paullinia cupana</i>                             | 6.9            |
| <i>Citrus aurantium</i>      | 5.1            | <i>Passiflora incarnata</i>  | 4.3            | <i>Cynara scolymus</i>                              | 5.7            |
| <i>Cinnamomum verum</i>      | 4.7            | <i>Paullinia cupana</i>      | 4.3            | <i>Echinacea spp.</i>                               | 5.7            |
| <i>Cimicifuga racemosa</i>   | 4.7            | <i>Glycyrrhiza glabra</i>    | 3.7            | <i>Olea europaea</i>                                | 5.7            |
| <i>Echinacea purpurea</i>    | 4.1            | <i>Ilex paraguariensis</i>   | 3.7            | <i>Oryza sativa+ Monascus purpureus (Red rice)</i>  | 5.7            |
| <i>Vitex agnus-castus</i>    | 3.9            | <i>Panax ginseng</i>         | 3.1            | <i>Panax ginseng</i>                                | 5.7            |
| <i>Hypericum perforatum</i>  | 3.9            | <i>Citrus aurantium</i>      | 2.5            | <i>Equisetum arvense</i>                            | 4.6            |
| <i>Panax ginseng</i>         | 3.3            | <i>Cynara scolymus</i>       | 2.5            | <i>Allium sativum</i>                               | 3.4            |
| <i>Valeriana officinalis</i> | 2.8            | <i>Dioscorea villosa</i>     | 2.5            | <i>Foeniculum vulgare</i>                           | 3.4            |
| <i>Vitis vinifera</i>        | 2.8            | <i>Allium ursinum</i>        | 1.9            | <i>Glycine max</i>                                  | 3.4            |
| <b>Total cases</b>           | <b>492</b>     | <b>Total cases</b>           | <b>161</b>     | <b>Total cases</b>                                  | <b>87</b>      |

<sup>a</sup>number of counts/total cases

doi:10.1371/journal.pone.0150089.t006

lists of plants most reported by Poisons Centers and by the consumers' survey are similar, sharing five out of 13 botanicals; among them *Valeriana officinalis* (garden valerian) and *Camellia sinensis* (tea) were in the first two positions. Moreover, a similar position in the ranking was occupied by *Paullinia cupana* (guarana), *Cynara scolymus* (globe artichoke), and *Panax ginseng* (chinese ginseng).

### Conclusions

The cases of adverse effects described here were self-reported and thus without any supporting clinical evidence; the agreement with data published in scientific papers and in particular with the survey performed by the PlantLIBRA project among Poisons Centers allows the following conclusions:

1. As reported previously, severe adverse effects related to PFS are quite rare [80];
2. Mild or moderate adverse symptoms can be present but most of them do not require clinical support;
3. Data reported in this paper confirm that some plants are more frequently involved in adverse effects than others and can help family doctors, among other health professionals, to become aware about the possible consequences of the increasing use of food supplements containing botanicals;
4. This information could also be used to educate the public as to the possibility of adverse effects associated with the consumption of these food supplements.

### Author Contributions

Conceived and designed the experiments: LSM LRB AGA BE LD FMM MMR MB. Analyzed the data: PR CDL RMV LRB AGA. Wrote the paper: PR CDL. Responsible for the survey: LSM. Coordination of the survey: AGA. Material elaboration: AGA BE LD FMM LRB MMR



MB. Data reviewing/handling/cleaning: AGA BE LD FMM LRB MB FB MS AM LU. Data analysis strategy: LRB LSM AGA RMV BE MMR LD FMM MB AM LU PR CDL AC SL. Drafts reviews: AC SL AGA LRB LD FMM BE MMR MB AM LU LSM. Manuscript coordination: PR.

## References

1. NBJ's Supplement Business Report. An analysis of markets, trends, competition and strategy in the U. S. dietary supplement industry. Nutrition Business Journal 2012. Available: [http://newhope360.com/site-files/newhope360.com/files/uploads/2013/04/TOC\\_SUMM120928.supp%20report%20FINAL%20standard.pdf](http://newhope360.com/site-files/newhope360.com/files/uploads/2013/04/TOC_SUMM120928.supp%20report%20FINAL%20standard.pdf). Accessed 8 January 2016.
2. Silano V, Coppens P, Larrañaga-Guetaria A, Minghetti P, Roth-Ehrang R. Regulations applicable to plant food supplements and related products in the European Union. Food Funct. 2011; 2: 710–719. doi: [10.1039/c1fo10105f](https://doi.org/10.1039/c1fo10105f) PMID: [21997496](https://pubmed.ncbi.nlm.nih.gov/21997496/)
3. European Advisory Services (EAS). The use of substances with nutritional or physiological effect other than vitamins and minerals in food supplements. Study undertaken for DG SANCO, European Commission. Service contract nrSANCO/2006/E4/018, 2007. Available: [http://ec.europa.eu/food/safety/docs/labelling\\_nutrition-supplements-2007\\_a540169\\_study\\_other\\_substances\\_en.pdf](http://ec.europa.eu/food/safety/docs/labelling_nutrition-supplements-2007_a540169_study_other_substances_en.pdf). Accessed 8 January 2016.
4. Skeie G, Braaten T, Hjartaker A, Lentjes M, Amiano P, Jakszyn P, et al. Use of dietary supplements in the European Prospective Investigation into Cancer and Nutrition calibration study. Eur J Clin Nutr. 2009; 63: S226–S238. doi: [10.1038/ejcn.2009.83](https://doi.org/10.1038/ejcn.2009.83) PMID: [19888276](https://pubmed.ncbi.nlm.nih.gov/19888276/)
5. Vargas-Murga L, Garcia-Alvarez A, Roman-Viñas B, Ngo J, Ribas-Barba L, van den Berg SJ, et al. Plant food supplement (PFS) market structure in EC Member States, methods and techniques for the assessment of individual PFS intake. Food Funct. 2011; 2: 731–739. doi: [10.1039/c1fo10075k](https://doi.org/10.1039/c1fo10075k) PMID: [21879100](https://pubmed.ncbi.nlm.nih.gov/21879100/)
6. Garcia-Alvarez A, Egan B, de Klein S, Dima L, Maggi FM, Isoniemi M, et al. Usage of plant food supplements across six European countries: findings from the PlantLIBRA consumer survey. PLoS One. 2014; 9: e92265. doi: [10.1371/journal.pone.0092265](https://doi.org/10.1371/journal.pone.0092265) PMID: [24642692](https://pubmed.ncbi.nlm.nih.gov/24642692/)
7. Valli G, Giardina EG. Benefits, adverse effects and drug interactions of herbal therapies with cardiovascular effects. J Am Coll Cardiol. 2002; 39: 1083–1095. PMID: [11923030](https://pubmed.ncbi.nlm.nih.gov/11923030/)
8. Pittler MH, Schmidt K, Ernst E. Adverse events of herbal food supplements for body weight reduction: systematic review. Obes Rev. 2005; 6: 93–111. PMID: [15836459](https://pubmed.ncbi.nlm.nih.gov/15836459/)
9. Di Lorenzo C, Ceschi A, Kupferschmidt H, Lüde S, De Souza Nascimento E, Dos Santos A, et al. Adverse effects of plant food supplements and botanical preparations: a systematic review with critical evaluation of causality. Br J Clin Pharmacol. 2015; 79: 578–592. doi: [10.1111/bcp.12519](https://doi.org/10.1111/bcp.12519) PMID: [25251944](https://pubmed.ncbi.nlm.nih.gov/25251944/)
10. WHO guidelines on safety monitoring of herbal medicines in pharmacovigilance systems. World Health Organization, Geneva, 2004.
11. Decree of the Italian Ministry of Health n 169 dated 21.07.2012 on "Disciplina dell'impiego negli integratori alimentari di sostanze e preparati vegetali—Allegato 1 Riferimento per gli effetti fisiologici" [Guidelines for the use of botanicals and derivatives in food supplements -Annex 1—Physiological effects]. Available: [http://www.salute.gov.it/imgs/C\\_17\\_pagineAree\\_1268\\_listaFile\\_itemName\\_2\\_file.pdf](http://www.salute.gov.it/imgs/C_17_pagineAree_1268_listaFile_itemName_2_file.pdf). Accessed 8 January 2016.
12. European Medicines Agency (EMA). Herbal medicine for human use. Available: [http://www.ema.europa.eu/ema/index.jsp?curl=pages/medicines/landing/herbal\\_search.jsp&mid=WC0b01ac058001fa1d](http://www.ema.europa.eu/ema/index.jsp?curl=pages/medicines/landing/herbal_search.jsp&mid=WC0b01ac058001fa1d). Accessed 8 January 2016.
13. Paur I, Carlsen MH, Halvorsen BL, Blomhoff R. Antioxidants in herbs and spices: roles in oxidative stress and redox signaling. In: Benzie IFF, Wachtel-Galor S, editors. Herbal medicine: Biomolecular and clinical aspects. 2nd edition. Boca Raton (FL): CRC Press; 2011. Chapter 2. Available: <http://www.ncbi.nlm.nih.gov/books/NBK92763>.
14. Ali BH, Blunden G, Tanira MO, Nemmar A. Some phytochemical, pharmacological and toxicological properties of ginger (*Zingiber officinale* Roscoe): a review of recent research. Food Chem Toxicol. 2008; 46: 409–420. PMID: [17950516](https://pubmed.ncbi.nlm.nih.gov/17950516/)
15. Erdogru O, Azirak S. Review of the studies on the red yeast rice (*Monascus purpureus*). Turkish Electronic J Biotech. 2004; 2: 37–49.
16. Lin CC, Li TC, Lai MM. Efficacy and safety of *Monascus purpureus* Went rice in subjects with hyperlipidemia. Eur J Endocrinol. 2005; 153: 679–686. PMID: [16260426](https://pubmed.ncbi.nlm.nih.gov/16260426/)
17. Liu J, Zhang J, Shi Y, Grimsgaard S, Alraek T, Fønnebø V. Chinese red yeast rice (*Monascus purpureus*) for primary hyperlipidemia: a meta-analysis of randomized controlled trials. Chin Med. 2006; 1: 4. PMID: [17302963](https://pubmed.ncbi.nlm.nih.gov/17302963/)

18. Klimek M, Wang S, Ogunkanmi A. Safety and efficacy of red yeast rice (*Monascus purpureus*) as an alternative therapy for hyperlipidemia. *P T*. 2009; 34: 313–327. PMID: [19572049](#)
19. DFG—Permanent Senate Commission on Food Safety SKLM. Toxicological evaluation of red mould rice: An update. Deutsche Forschungsgemeinschaft, 2013. Available: [http://www.dfg.de/download/pdf/dfg\\_im\\_profil/reden\\_stellungnahmen/2013/131206\\_sklm\\_red\\_mould\\_rice\\_update.pdf](http://www.dfg.de/download/pdf/dfg_im_profil/reden_stellungnahmen/2013/131206_sklm_red_mould_rice_update.pdf)
20. Cheetham PJ. Role of complimentary therapy for male LUTS. *Curr Urol Rep*. 2013; 14: 606–613. doi: [10.1007/s11934-013-0372-3](#) PMID: [24026362](#)
21. Drozd J, Anuszevska E. The effect of the *Melissa officinalis* extract on immune response in mice. *Acta Pol Pharm*. 2003; 60: 467–470. PMID: [15080594](#)
22. Ghanbari R, Anwar F, Alkharfy KM, Gilani AH, Saari N. Valuable nutrients and functional bioactives in different parts of olive (*Olea europaea* L.)-a review. *Int J Mol Sci*. 2012; 13: 3291–3340. doi: [10.3390/ijms13033291](#) PMID: [22489153](#)
23. Akbay P, Basaran AA, Undeger U, Basaran N. *In vitro* immunomodulatory activity of flavonoid glycosides from *Urtica dioica* L. *Phytother Res*. 2003; 17: 34–37. PMID: [12557244](#)
24. Borsuk OS, Masnaya NV, Sherstoboev EY, Isaykina NV, Kalinkina GI, Reihart DV. Effects of drugs of plant origin on the development of the immune response. *Bull Exp Biol Med*. 2011; 151: 194–196. PMID: [22238748](#)
25. UMM—University of Maryland Medical Center. Spirulina. 2013 c. Available: <http://umm.edu/health/medical/altmed/supplement/spirulina>. Accessed 8 January 2016.
26. Karkos PD, Leong SC, Karkos CD, Sivaji N, Assimakopoulos DA. Spirulina in clinical practice: evidence-based human applications. *Evid Based Complement Alternat Med*. 2011; 2011: 531053. doi: [10.1093/ecam/nen058](#) PMID: [18955364](#)
27. Reuter J, Merfort I, Schempp CM. Botanicals in dermatology: an evidence-based review. *Am J Clin Dermatol*. 2010; 11: 247–267. doi: [10.2165/11533220-000000000-00000](#) PMID: [20509719](#)
28. Prager N, Bickett K, French N, Marcovici G. A randomized, double-blind, placebo-controlled trial to determine the effectiveness of botanically derived inhibitors of 5-alpha-reductase in the treatment of androgenetic alopecia. *J Altern Complement Med*. 2002; 8: 143–152. PMID: [12006122](#)
29. Shenefelt PD. Herbal treatment for dermatological disorders. In: Benzie IFF, Wachtel-Galor S, eds. *Herbal medicine: biomolecular and clinical aspects*, 2nd edition. Boca Raton (FL), CRC Press. 2011, Cap 18.
30. Fleming T. Medical Economics Co; PDR for herbal medicines. Montvale (NJ), 2nd ed. 2000.
31. Salem ML. Immunomodulatory and therapeutic properties of the *Nigella sativa* L. seed. *Int Immunopharmacol*. 2005; 5: 1749–1770. PMID: [16275613](#)
32. Kaatabi H, Bamosa AO, Lebda FM, Al Elq AH, Al-Sultan AI. Favorable impact of *Nigella sativa* seeds on lipid profile in type 2 diabetic patients. *J Family Community Med*. 2012; 19: 155–161. doi: [10.4103/2230-8229.102311](#) PMID: [23230380](#)
33. Oh GN, Son SW. Efficacy of korean red ginseng in the treatment of alopecia areata. *J Ginseng Res*. 2012; 36: 391–395. doi: [10.5142/jgr.2012.36.4.391](#) PMID: [23717141](#)
34. Kim SH, Park KS. Effects of Panax ginseng extract on lipid metabolism in humans. *Pharmacol Res*. 2003; 48: 511–513. PMID: [12967598](#)
35. Bailey RL, Saldanha LG, Dwyer JT. Estimating caffeine intake from energy drinks and dietary supplements in the United States. *Nutr Rev*. 2014; 72 Suppl 1: 9–13. doi: [10.1111/nure.12138](#) PMID: [25293539](#)
36. Arun N, Singh DP. *Punica granatum*: a review on pharmacological and therapeutic properties. *Int J Pharmaceutical Sci Res*. 2012; 3: 1240–1245.
37. Harris JC, Cottrell SL, Plummer S, Lloyd D. Antimicrobial properties of *Allium sativum* (garlic). *Appl Microbiol Biotechnol*. 2001; 57: 282–286. PMID: [11759674](#)
38. Wright CI, Van-Buren L, Kroner CI, Koning MM. Herbal medicines as diuretics: a review of the scientific evidence. *J Ethnopharmacol*. 2007; 114: 1–31. PMID: [17804183](#)
39. EFSA—Scientific opinion on the substantiation of health claims related to *Cyamopsis tetragonoloba* (L.) Taubert and maintenance or achievement of a normal body weight (ID 2428) and long-term maintenance of normal blood glucose concentrations (ID 2429) pursuant to Article 13 (1) of Regulation (EC) No 1924/2006. *EFSA J*. 2009; 7: 1287.
40. Pittler MH, Ernst E. Guar gum for body weight reduction: meta-analysis of randomized trials. *Am J Med*. 2001; 110: 724–730. PMID: [11403757](#)
41. Chacko SM, Thambi PT, Kuttan R, Nishigaki I. Beneficial effects of green tea: a literature review. *Chin Med*. 2010; 5: 13. doi: [10.1186/1749-8546-5-13](#) PMID: [20370896](#)

42. Davis RH, Stewart GJ, Bregman PJ. *Aloe vera* and the inflamed synovial pouch model. *J Am Podiatr Med Assoc.* 1992; 82: 140–148. PMID: [1578350](#)
43. Barrett B. Medicinal properties of *Echinacea*: a critical review. *Phytomedicine.* 2003; 10: 66–86. PMID: [12622467](#)
44. Pamham MJ. Benefit-risk assessment of the squeezed sap of the purple coneflower (*Echinacea purpurea*) for long-term oral immunostimulation. *Phytomedicine* 1996; 3: 95–102 doi: [10.1016/S0944-7113\(96\)80020-1](#) PMID: [23194871](#)
45. Chaabane M, Bidat E, Chevallier B. A new case of food protein-induced enterocolitis syndrome. *Arch Pediatr.* 2010; 17: 502–506. doi: [10.1016/j.arcped.2010.02.011](#) PMID: [20346636](#)
46. Minami T, Fukutomi Y, Saito A, Sekiya K, Tsuburai T, Taniguchi M, Akiyama K. Frequent episodes of adult soybean allergy during and following the pollen season. *J Allergy Clin Immunol: In Practice* 2015; 3: 441–442.e1.
47. EMA (European Medicines Agency). Community herbal monograph on *Zingiber officinale* Roscoe, rhizoma. Last version March 2012. 2012 (b). Available: [http://www.ema.europa.eu/docs/en\\_GB/document\\_library/Herbal\\_-\\_Community\\_herbal\\_monograph/2012/06/WC500128142.pdf](http://www.ema.europa.eu/docs/en_GB/document_library/Herbal_-_Community_herbal_monograph/2012/06/WC500128142.pdf). Accessed 8 January 2016.
48. EMA (European Medicines Agency). Community herbal monograph on *Arctium lappa* L., radix. Last version September 2010. 2010 c. Available: [http://www.ema.europa.eu/docs/en\\_GB/document\\_library/Herbal\\_-\\_Community\\_herbal\\_monograph/2011/01/WC500100388.pdf](http://www.ema.europa.eu/docs/en_GB/document_library/Herbal_-_Community_herbal_monograph/2011/01/WC500100388.pdf). Accessed 8 January 2016.
49. EMA (European Medicines Agency). European Union herbal monograph on *Betula pendula* Roth and/or *Betula pubescens* Ehrh. as well as hybrids of both species, folium. Last version November 2014 (a). Available: [http://www.ema.europa.eu/docs/en\\_GB/document\\_library/Herbal\\_-\\_Community\\_herbal\\_monograph/2015/03/WC500184282.pdf](http://www.ema.europa.eu/docs/en_GB/document_library/Herbal_-_Community_herbal_monograph/2015/03/WC500184282.pdf). Accessed 8 January 2016.
50. Henderson JA, Evans EV, McIntosh RA. The antithiamine action of *Equisetum*. *J Am Vet Med Assoc.* 1952; 120: 375–378. PMID: [14927511](#)
51. EMA (European Medicines Agency). Community herbal monograph on *Camellia sinensis* (L.) Kuntze, non fermentatum folium. Last version November 2013 (a). Available: [http://www.ema.europa.eu/docs/en\\_GB/document\\_library/Herbal\\_-\\_Community\\_herbal\\_monograph/2014/04/WC500165888.pdf](http://www.ema.europa.eu/docs/en_GB/document_library/Herbal_-_Community_herbal_monograph/2014/04/WC500165888.pdf). Accessed 8 January 2016.
52. UMM—University of Maryland Medical Center. Red Yeast Rice. 2013 a. Available: <http://umm.edu/health/medical/altmed/supplement/red-yeast-rice>. Accessed 8 January 2016.
53. Burnham TH, Sjweain SL, Short RM eds, *Monascus* In: The review of Natural Products, St Louis, MO, Facts and Comparisons, 1997.
54. Cunningham AB, Mbenkum FT eds. Sustainability of harvesting *Prunus africana* bark in Cameroon. A medicinal plant in international trade. People and plants working paper. The United Nations Educational, Scientific and Cultural Organization, Paris, UNESCO Press, 1993.
55. NIAMS—National Institute of Arthritis and Musculoskeletal and Skin Diseases. Research Finds Link Between Statin Use and Progressive Muscle Disease. 2011, Available: [http://www.niams.nih.gov/news\\_and\\_events/spotlight\\_on\\_research/2011/statin\\_use.asp](http://www.niams.nih.gov/news_and_events/spotlight_on_research/2011/statin_use.asp). Accessed 8 January 2016.
56. Unsel M, Ardeniz O, Mete N, Ersoy R, Sin AZ, Gulbahar O, Kokuludad A. Food allergy due to olive. *J Investig Allergol Clin Immunol* 2009; 19: 497–9. PMID: [20128426](#)
57. NCCIH—National Center for Complementary and Integrative Health—NIH. 2012. Green tea. Available at: <https://nccih.nih.gov/health/greentea>
58. McIntyre A. *Urtica dioica/urens*. In: *Herbal treatment of children: western and ayurvedic perspectives*. Elsevier Health Science, 2005, pp 59–60.
59. EMA (European Medicines Agency). Assessment report on *Cynara scolymus* L., folium. Last version November 2011 (a). Available: [http://www.ema.europa.eu/docs/en\\_GB/document\\_library/Herbal\\_-\\_HMPC\\_assessment\\_report/2011/12/WC500119940.pdf](http://www.ema.europa.eu/docs/en_GB/document_library/Herbal_-_HMPC_assessment_report/2011/12/WC500119940.pdf). Accessed 8 January 2016.
60. Mayo Clinic. Valerian: A safe and effective herbal sleep aid? 2010. <http://www.mayoclinic.com/health/valerian/AN02046> <http://www.mayoclinic.com/health/valerian/AN02046>. Accessed 8 January 2016.
61. Salehi B, Imani R, Mohammadi MR, Fallah J, Mohammadi M, Ghanizadeh A, et al. *Ginkgo biloba* for attention-deficit/hyperactivity disorder in children and adolescents: a double blind, randomized controlled trial. *Prog Neuropsychopharmacol Biol Psychiatry.* 2010; 34: 76–80. doi: [10.1016/j.pnpbp.2009.09.026](#) PMID: [19815048](#)
62. Mayo Clinic. *Ginkgo (Ginkgo biloba)*. 2013. <http://www.mayoclinic.org/drugs-supplements/ginkgo/safety/hrb-20059541>. Accessed 8 January 2016.
63. EMA (European Medicines Agency). Community herbal monograph on *Panax ginseng* C.A. Meyer, radix. Last version July 2013 (b). Available: [http://www.ema.europa.eu/docs/en\\_GB/document\\_library/](http://www.ema.europa.eu/docs/en_GB/document_library/)

- [Herbal - HMPC opinion on Community herbal monograph/2013/04/WC500142082.pdf](#) Accessed 8 January 2016.
64. EMA (European Medicines Agency). Assessment report on *Oenothera biennis* L., *Oenothera lamarckiana* L., oleum. Last version December 2011. 2011 c Available: [http://www.ema.europa.eu/docs/en\\_GB/document\\_library/Herbal\\_-\\_HMPC\\_assessment\\_report/2012/04/WC500124922.pdf](http://www.ema.europa.eu/docs/en_GB/document_library/Herbal_-_HMPC_assessment_report/2012/04/WC500124922.pdf). Accessed 8 January 2016.
  65. EMA (European Medicines Agency). Community herbal monograph on *Cassia senna* L., fructus and *Cassia angustifolia* Vahl, fructus. Last version September 2006. Available: [http://www.ema.europa.eu/docs/en\\_GB/document\\_library/Herbal\\_-\\_Community\\_herbal\\_monograph/2009/12/WC500018202.pdf](http://www.ema.europa.eu/docs/en_GB/document_library/Herbal_-_Community_herbal_monograph/2009/12/WC500018202.pdf). Accessed 8 January 2016.
  66. EMA (European Medicines Agency). Community herbal monograph on *Rhamnus purshianus* D.C., cortex. Last version September 2007. Available: [http://www.ema.europa.eu/docs/en\\_GB/document\\_library/Herbal\\_-\\_Community\\_herbal\\_monograph/2009/12/WC500018424.pdf](http://www.ema.europa.eu/docs/en_GB/document_library/Herbal_-_Community_herbal_monograph/2009/12/WC500018424.pdf). Accessed 8 January 2016.
  67. Bauer BA. I read that the herbal supplements valerian can help you fall asleep if you have insomnia. Is valerian safe, and does it actually work? Mayo Clinic website, Available: <http://www.mayoclinic.org/diseases-conditions/insomnia/expert-answers/valerian/faq-20057875>. Accessed 8 January 2016.
  68. PennState Hershey, Milton S. Hershey Medical Center. Pomegranate. Available: <http://pennstatehershey.adam.com/content.aspx?productid=107&pid=33&gid=002881>. Accessed 8 January 2016.
  69. EMA (European Medicines Agency). Community herbal monograph on *Valeriana officinalis* L., radix and *Humulus lupulus* L., flos. Last version May 2010 (b). Available: [http://www.ema.europa.eu/docs/en\\_GB/document\\_library/Herbal\\_-\\_Community\\_herbal\\_monograph/2010/09/WC500096128.pdf](http://www.ema.europa.eu/docs/en_GB/document_library/Herbal_-_Community_herbal_monograph/2010/09/WC500096128.pdf). Accessed 8 January 2016.
  70. EMA (European Medicines Agency). Assessment report on *Paullinia cupana* Kunth ex H.B.K., var. *sorbilis* (Mart.) Ducke, semen. Last version May 2012. 2012 (c). Available: [http://www.ema.europa.eu/docs/en\\_GB/document\\_library/Herbal\\_-\\_HMPC\\_assessment\\_report/2012/06/WC500129149.pdf](http://www.ema.europa.eu/docs/en_GB/document_library/Herbal_-_HMPC_assessment_report/2012/06/WC500129149.pdf). Accessed 8 January 2016.
  71. EMA (European Medicines Agency). Community herbal monograph on *Harpagophytum procumbens* DC. and/or *Harpagophytum zeyheri* Decne, radix. Last version November 2008. Available: [http://www.ema.europa.eu/docs/en\\_GB/document\\_library/Herbal\\_-\\_Community\\_herbal\\_monograph/2010/01/WC500059018.pdf](http://www.ema.europa.eu/docs/en_GB/document_library/Herbal_-_Community_herbal_monograph/2010/01/WC500059018.pdf). Accessed 8 January 2016.
  72. EMA (European Medicines Agency). European Union herbal monograph on *Equisetum arvense* L., herba. Discussion in MLWP May 2015b. Available at: [http://www.ema.europa.eu/docs/en\\_GB/document\\_library/Herbal\\_-\\_Herbal\\_monograph/2009/12/WC500018411.pdf](http://www.ema.europa.eu/docs/en_GB/document_library/Herbal_-_Herbal_monograph/2009/12/WC500018411.pdf). Accessed 8 January 2016.
  73. UMM—University of Maryland Medical Center. Echinacea. 2014. Available: <http://umm.edu/health/medical/altmed/herb/echinacea>. Accessed 8 January 2016.
  74. UMM—University of Maryland Medical Center. Garlic. 2013 b. Available: <http://umm.edu/health/medical/altmed/herb/garlic>. Accessed 8 January 2016.
  75. Smith N, Atroch AL. Guaraná's Journey from Regional Tonic to Aphrodisiac and Global Energy Drink. Evid Based Complement Alternat Med. 2010; 7: 279–282. doi: [10.1093/ecam/nem162](https://doi.org/10.1093/ecam/nem162) PMID: [18955289](https://pubmed.ncbi.nlm.nih.gov/18955289/)
  76. Kabalak AA, Soyal OB, Urfalioglu A, Saracoglu F, Gogus N. Menometrorrhagia and tachyarrhythmia after using oral and topical ginseng. J Womens Health (Larchmt). 2004; 13: 830–833.
  77. eHealthMe—Review: could Ginkgo biloba cause Insomnia? Available at: <http://www.ehealthme.com/ds/ginkgo+biloba/insomnia>. Accessed 8 January 2016.
  78. EMA (European Medicines Agency). Community herbal monograph on *Ginkgo biloba* L. folium. Last version January 2014 (b). Available: [http://www.ema.europa.eu/docs/en\\_GB/document\\_library/Herbal\\_-\\_Community\\_herbal\\_monograph/2014/02/WC500161210.pdf](http://www.ema.europa.eu/docs/en_GB/document_library/Herbal_-_Community_herbal_monograph/2014/02/WC500161210.pdf). Accessed 8 January 2016.
  79. Lonsdale D. Thiamin deficiency and alopecia. Journal of Advancement in Medicine 1998; 11: 209–212.
  80. Lüde S, Vecchio S, Sinno-Tellier S, Dopter A, Mustonen H, Vucinic S, Jonsson B, Müller D, Fruchtagarten L, Hruby K, De Souza Nascimento E, Restani P, Kupferschmidt H, Ceschi A. Retrospective Poisons Centers-based study on adverse effects due to plant food supplements. Clin Toxicology 2013; 51: 267–268.
